# Supplementary material for: Bacterial Community Selection of Russula griseocarnosa Mycosphere Soil
Source: Front Microbiol. 2020 Mar 25;11:347. doi: 10.3389/fmicb.2020.00347 (PMC7109302; doi:10.3389/fmicb.2020.00347)
Supplement: Supplementary file 1 [file Table_1.XLSX]

## Sheet: Sheet1
Table S1. Pairwise geographic distance (km) matrix
Sample	DT	YA	ZP	FS	JL	HTC	JJ	LJ	THL	YY
DT	0
YA	26.6406	0
ZP	61.7362	72.6808	0
FS	233.687	232.991	176.076	0
JL	194.113	188.86	143.022	55.5097	0
HTC	757.103	740.782	720.696	577.695	583.909	0
JJ	743.414	727.098	707.04	564.371	570.344	13.6896	0
LJ	763.483	747.194	726.979	583.639	590.074	6.49526	20.1068	0
THL	681.566	664.376	647.593	512.12	513.747	81.5889	68.9758	87.9902	0
YY	653.803	636.995	618.987	482.186	484.411	104.82	91.323	111.312	30.1604	0
