# Supplementary material for: Bacterial Community Selection of Russula griseocarnosa Mycosphere Soil
Source: Front Microbiol. 2020 Mar 25;11:347. doi: 10.3389/fmicb.2020.00347 (PMC7109302; doi:10.3389/fmicb.2020.00347)
Supplement: Supplementary file 2 [file Table_2.XLSX]

## Sheet: Sheet1
Table S2. Welch’s t-test of mycosphere soil and bulk soil on soil parameters
Sample		pH		SOC (g/kg)		AN (mg/kg)		AP (mg/kg)		AK (mg/kg)
		pH Mean	p-value	SOC Mean	p-value	AN Mean	p-value	AP Mean	p-value	AK Mean	p-value
DT	DT	4.09	0.975	77.28	0.104	394.13	0.006	6.52	0.111	160.76	0.155
	DTCK	4.09		69.42		321.54		4.19		121.84
YA	YA	4.14	0.014	58.26	0.027	344.17	0.26	3.73	0.004	152.03	0.028
	YACK	3.97		89.19		312.34		2.24		129.93
ZP	ZP	4.2	0.001	71.74	0.001	369.88	0	19.6	0.044	318.03	0
	ZPCK	3.88		139.07		230.17		6.31		154.93
FS	FS	4.39	0.685	25.79	0.288	214.18	0.438	4.8	0.384	231.93	0.187
	FSCK	4.46		12.88		132.48		2.44		112.14
JL	JL	3.99	0	99.36	0.01	643.08	0.018	10.15	0.059	241.31	0.102
	JLCK	6.43		16.78		102.12		80.04		79.25
HTC	HTC	4.55	0.668	60.39	0.022	251.71	0.183	4.98	0.236	95.75	0.147
	HTCCK	4.5		25.63		179.4		1.67		71.7
JJ	JJ	4.17	0.032	43.07	0.855	224.94	0.137	9.4	0.076	153.32	0.02
	JJCK	4.3		46.27		172.5		3.65		89.49
LJ	LJ	4.3	0	36.73	0.016	231.01	0.041	3.77	0.466	130.68	0.21
	LJCK	4.65		14.98		133.4		5.3		181.14
THL	THL	4.21	0.052	40.37	0.137	321.82	0.093	4.1	0.413	111.6	0.135
	THLCK	4.05		34.4		252.54		3.26		85.72
YY	YY	4.11	0.085	34.45	0.306	275.45	0.621	5.19	0.215	295.65	0.092
	YYCK	4.22		26.08		246.56		3.63		123.46
Bold : p<0.05
