# Supplementary material for: Bacterial Community Selection of Russula griseocarnosa Mycosphere Soil
Source: Front Microbiol. 2020 Mar 25;11:347. doi: 10.3389/fmicb.2020.00347 (PMC7109302; doi:10.3389/fmicb.2020.00347)
Supplement: Supplementary file 4 [file Table_4.XLSX]

## Sheet: Sheet1
Table S4. Welch’s t-test of mycosphere soil and bulk soil on top 30 genus
Genus	DT			YA			ZP			FS			JL			HTC			JJ			LJ			THL			YY
	DT-Mean(%)	DTCK-Mean(%)	p-value	YA-Mean(%)	YACK-Mean(%)	p-value	ZP-Mean(%)	ZPCK-Mean(%)	p-value	FS-Mean(%)	FSCK-Mean(%)	p-value	JL-Mean(%)	JLCK-Mean(%)	p-value	HTC-Mean(%)	HTCCK-Mean(%)	p-value	JJ-Mean(%)	JJCK-Mean(%)	p-value	LJ-Mean(%)	LJCK-Mean(%)	p-value	THL-Mean(%)	THLCK-Mean(%)	p-value	YY-Mean(%)	YYCK-Mean(%)	p-value
Acidibacter	1.631	2.294	0.01236	2.786	2.852	0.8784	3.554	3.122	0.3404	3.148	1.587	0.02915	2.19	0.8367	0.00393	2.975	2.949	0.9752	3.155	2.897	0.7104	3.064	1.811	0.02467	2.811	4.295	0.03282	2.998	3.924	0.3336
Acidobacterium	0.5119	0.4802	0.8701	0.915	1.185	0.06665	1.025	0.6347	0.06076	0.7493	0.3668	0.1328	1.05	0.02473	0.01598	1.502	0.7543	0.1859	2.414	0.6821	0.1202	0.706	1.146	0.2192	1.809	1.204	0.3958	0.6875	1.037	0.4836
Acidothermus	6.866	6.168	0.5857	8.153	15.18	0.0002454	12.3	13.46	0.5446	3.181	4.468	0.1089	8.612	0.07625	5.807e-05	7.216	8.041	0.6308	8.836	6.04	0.03771	5.134	3.697	0.122	6.211	9.243	0.16	6.723	4.332	0.08053
Actinospica	0.3722	0.2679	0.4734	0.23	0.2473	0.8135	0.2151	0.1587	0.2712	0.7852	2.374	0.07718	0.2856	0.01649	0.01882	1.947	0.5873	0.3225	0.5502	0.3277	0.181	0.3709	0.3668	0.9677	1.329	0.4884	0.08669	0.4093	0.4431	0.8307
Bradyrhizobium	5.238	5.175	0.9578	2.725	1.605	0.04517	5.285	4.585	0.4957	5.442	2.728	0.02827	2.917	2.37	0.3317	3.777	2.819	0.2367	3.577	6.572	0.1479	5.908	3.186	0.002014	5.462	5.269	0.8826	3.912	5.743	0.2638
Bryobacter	3.655	3.485	0.7098	2.27	1.789	0.04248	2.338	1.974	0.04575	2.462	2.897	0.5037	2.709	0.5173	0.01008	2.206	2.005	0.7077	3.62	3.573	0.9577	2.789	2.345	0.2624	1.631	2.358	0.3127	2.379	2.819	0.5479
Burkholderia-Paraburkholderia	1.776	1.204	0.2335	1.569	1.152	0.1387	2.48	2.063	0.2317	4.659	1.23	0.01412	3.724	0.5193	0.1587	5.918	4.81	0.483	2.767	2.518	0.8399	5.23	3.812	0.2655	15.63	2.712	0.01242	6.151	11.64	0.02462
Candidatus_Koribacter	0.9756	1.004	0.9152	0.7246	0.3009	0.01298	0.5255	0.6285	0.3808	0.4872	0.1813	0.1198	0.366	0.0103	0.03759	0.5168	0.6883	0.458	1.026	0.5358	0.2515	0.5131	0.3524	0.2463	0.3042	0.2123	0.3561	0.5539	0.3792	0.3246
Candidatus_Solibacter	4.877	6.871	0.05422	4.777	3.769	0.07276	3.393	3.083	0.548	4.174	1.086	0.02324	2.535	0.3874	0.000764	3.065	3.961	0.2407	4.53	4.917	0.7371	3.995	2.236	0.007119	2.789	4.692	0.09677	5.457	4.478	0.464
Candidatus_Xiphinematobacter	2.117	1.752	0.6374	0.8643	0.5791	0.3801	0.3573	0.2308	0.472	2.42	0.5564	0.02563	0.7716	0.006182	0.07026	2.237	1.513	0.5134	1.474	1.259	0.7138	2.244	2.015	0.8114	1.908	0.9995	0.2018	1.797	1.869	0.9478
Isosphaera	0.6788	0.6471	0.8574	1.322	0.4039	0.002652	0.2757	0.2576	0.8588	0.7555	0.04122	0.01506	0.5304	0.02679	0.0006626	0.8087	0.7522	0.8411	0.7827	0.8511	0.7946	0.5725	0.4204	0.3337	0.6281	0.5028	0.5093	0.617	0.5894	0.9092
Mycobacterium	2.41	4.528	0.07731	2.916	1.865	0.06958	2.334	0.8944	0.05281	1.304	0.1154	0.003556	1.089	0.645	0.03768	3.142	1.859	0.1158	1.396	1.492	0.716	1.941	0.779	0.0023	2.224	0.5976	0.04448	2.365	1.972	0.3812
norank_c__Acidobacteria	9.797	9.486	0.9188	13.15	8.884	0.03113	4.015	4.816	0.4859	11.32	1.795	0.01428	5.661	6.836	0.4107	8.089	6.09	0.5097	9.773	12.79	0.4732	9.418	7.165	0.2964	5.318	13.21	0.08894	8.302	4.983	0.334
norank_c__OPB35_soil_group	0.9793	0.6182	0.3669	0.6578	0.8676	0.5576	0.8532	0.577	0.5253	0.5935	0.103	0.0522	0.324	0.103	0.06379	0.4303	0.3359	0.6608	0.7023	0.3957	0.2702	0.6739	0.6491	0.8976	0.2349	0.7316	0.1436	0.6788	0.5193	0.556
norank_f__Acidobacteriaceae__Subgroup_1_	6.788	4.598	0.3699	6.616	5.612	0.3852	4.512	6.916	0.04694	5.327	3.639	0.2805	7.341	0.6656	0.005832	5.8	5.189	0.7166	5.709	5.861	0.9418	4.538	4.206	0.7406	2.634	6.516	0.08805	5.706	6.197	0.8653
norank_f__DA111	6.504	8.773	0.08459	5.893	6.24	0.8127	3.939	3.757	0.7153	9.511	2.755	0.007758	6.374	0.2226	0.003724	5.334	6.706	0.307	7.62	11.15	0.07924	9.333	2.467	0.00411	5.914	6.057	0.9188	7.863	5.253	0.1092
norank_f__ODP1230B8.23	0.7815	0.8449	0.7875	1.144	1.193	0.8163	2.09	2.691	0.2753	0.8655	4.245	0.0002285	2.238	0.0577	0.001179	1.013	1.171	0.7061	1.016	0.4925	0.1376	0.7184	0.8758	0.3272	2.072	1.171	0.2223	1.254	2.151	0.3818
norank_f__Planctomycetaceae	2.106	2.869	0.4449	5.117	2.428	0.0192	1.527	1.956	0.6027	5.311	1.587	0.03622	4.906	0.3462	0.02429	2.681	3.994	0.4358	3.466	3.979	0.7055	4.148	3.258	0.4413	2.151	3.11	0.3214	3.593	2.386	0.459
norank_f__YNPFFP1	0.4674	0.3524	0.2606	0.4798	0.7336	0.3353	2.213	2.355	0.7761	0.6331	1.37	0.08043	3.489	0.004122	1.057e-05	0.6504	0.5956	0.8348	1.136	0.1937	0.02268	0.5304	1.119	0.1443	1.06	0.4967	0.03135	0.9335	0.6533	0.19
norank_o__Acidimicrobiales	2.048	1.599	0.1215	1.682	2.292	0.2615	3.889	3.955	0.9172	0.8581	0.5791	0.1286	1.755	1.587	0.4278	1.961	1.601	0.5651	1.619	0.9088	0.09414	1.029	1.067	0.7833	2.059	1.748	0.3892	2.348	1.692	0.1779
norank_o__JG30-KF-AS9	1.292	0.5647	0.0784	1.968	2.193	0.7676	0.345	0.6698	0.1668	0.2325	1.274	0.06863	0.3042	0.08655	0.00145	1.177	1.208	0.9223	0.6628	0.4225	0.4266	0.5849	0.6883	0.4711	0.6034	0.713	0.6389	0.6059	0.5605	0.8551
norank_o__Xanthomonadales	0.7246	0.746	0.9124	0.7852	1.012	0.2776	1.16	0.542	0.0719	0.6355	0.1443	0.00107	0.3784	0.9459	0.01442	0.2411	0.1649	0.3643	0.2794	0.3627	0.3693	0.4291	0.4554	0.7414	0.8754	0.7687	0.6295	0.2955	0.2679	0.6792
Rhizomicrobium	0.8321	0.8387	0.9754	1.18	1.48	0.1806	2.163	1.818	0.2842	1.203	0.7295	0.07794	1.162	0.7625	0.1044	0.6368	0.5894	0.7121	1.068	1.053	0.9605	0.8915	0.983	0.6539	1.124	1.533	0.2131	1.314	1.03	0.3755
Roseiarcus	2.351	1.585	0.1133	1.635	1.377	0.4857	3.358	1.713	0.0518	2.061	0.4389	0.00491	1.557	0.02473	0.006148	1.96	1.012	0.2717	1.685	0.812	0.1236	2.247	0.8016	0.01929	2.138	0.9768	0.07461	2.039	1.204	0.04025
Singulisphaera	0.6566	0.7625	0.6874	1.306	0.6409	0.1678	0.7085	0.577	0.6894	0.9793	0.237	0.03086	0.8717	0.103	0.005516	0.4414	0.4266	0.9376	0.6207	0.4719	0.5404	0.4488	0.7378	0.08315	0.8853	0.7192	0.5116	0.5539	0.4307	0.5641
Sorangium	1.485	1.645	0.529	1.417	1.09	0.0279	1.347	1.344	0.9761	1.721	0.6491	0.0253	0.7975	0.1917	0.03111	0.9768	1.15	0.3587	1.437	0.9088	0.2827	1.347	0.5894	0.02494	1.114	1.467	0.1522	1.074	1.065	0.9622
unclassified_f__Acetobacteraceae	1.961	1.41	0.1871	1.062	1.131	0.7583	1.431	1.255	0.1219	1.564	0.6162	0.044	1.795	0.103	0.01101	1.528	2.217	0.1161	2.553	1.799	0.326	1.813	1.067	0.003024	1.154	0.9067	0.4982	1.72	1.519	0.6104
unclassified_f__Acidobacteriaceae__Subgroup_1_	0.9212	1.035	0.7504	0.9484	1.03	0.5912	1.117	1.191	0.7618	1.764	0.9109	0.2975	1.46	0.09892	0.03618	1.021	1.142	0.6941	1.234	0.9603	0.4668	0.7419	1.375	0.01533	0.9781	1.012	0.9356	1.155	1.758	0.5285
unclassified_k__norank	1.439	1.232	0.2427	1.079	1.288	0.1352	1.861	2.088	0.4991	0.5416	1.29	0.000618	1.321	0.1752	0.01137	0.9991	0.849	0.2546	0.894	0.6801	0.2513	0.6071	0.7769	0.0677	1.05	1.416	0.04523	1.209	0.88	0.1445
Variibacter	7.479	8.272	0.7106	7.011	9.622	0.008708	8.064	10.24	0.2386	9.675	1.653	0.0002016	5.934	3.314	0.007837	9.881	11.07	0.6238	8.378	7.668	0.7586	11.99	3.202	0.003904	6.456	7.291	0.6908	10.2	7.798	0.2247
Bold : p<0.05
